# Supplementary material
Source: PubMed Central journal article supplement (PMC3007099)
Supplement: NIHMS250492-supplement-01.pdf [file NIHMS250492-supplement-01.pdf]

Supplementary table 1. Neutralization analysis of Env pseudoviruses with autologous and heterologous plasmas.

| Pseudovirus | ID <sub>50</sub> in T2M-bl cells <sup>1</sup> |       |       |       |       |       |       |       |       |       |       |       |       |       |       |       | HIVlg (mg/ml) |
|-------------|-----------------------------------------------|-------|-------|-------|-------|-------|-------|-------|-------|-------|-------|-------|-------|-------|-------|-------|---------------|
|             | ZM377                                         | ZM380 | ZM383 | ZM384 | ZM394 | ZM413 | ZM418 | ZM378 | ZM379 | ZM395 | ZM401 | ZM405 | ZM408 | ZM415 | ZM416 | ZM417 |               |
| ZM377.1     | 26                                            | 131   | 41    | 84    | 74    | 63    | 10    | 217   | 146   | 770   | 29    | 10    | 640   | 55    | 401   | 26    | 625           |
| ZM377.11    | 10                                            | 24    | 23    | 75    | 203   | 20    | 28    | 786   | 83    | 1,639 | 27    | 10    | 602   | 71    | 528   | 32    | 832           |
| ZM377.16    | 10                                            | 24    | 10    | 56    | 267   | 10    | 23    | 542   | 101   | 994   | 29    | 10    | 341   | 55    | 445   | 10    | 906           |
| ZM377.5     | 42                                            | 28    | 39    | 110   | 204   | 31    | 27    | 1,086 | 121   | 1,121 | 42    | 22    | 202   | 76    | 716   | 32    | 568           |
| ZM377.24    | 10                                            | 21    | 47    | 79    | 235   | 53    | 10    | 1,088 | 170   | 564   | 141   | 10    | 1,382 | 48    | 371   | 26    | 1,299         |
| ZM377.3     | 22                                            | 20    | 10    | 10    | 28    | 10    | 10    | 21    | 106   | 39    | 30    | 10    | 120   | 199   | 37    | 42    | 1,992         |
| ZM380.1     | 49                                            | 10    | 60    | 24    | 30    | 10    | 24    | 193   | 82    | 431   | 326   | 64    | 1,162 | 136   | 123   | 149   | 440           |
| ZM380.5     | 10                                            | 10    | 22    | 10    | 10    | 10    | 10    | 119   | 80    | 85    | 111   | 36    | 504   | 89    | 58    | 44    | 878           |
| ZM380.11    | 26                                            | 10    | 51    | 26    | 36    | 10    | 10    | 135   | 58    | 222   | 69    | 72    | 536   | 73    | 123   | 82    | 596           |
| ZM380.12    | 21                                            | 10    | 26    | 21    | 23    | 10    | 10    | 113   | 69    | 67    | 39    | 44    | 424   | 38    | 75    | 52    | 842           |
| ZM384.2     | 24                                            | 10    | 10    | 10    | 23    | 10    | 10    | 24    | 57    | 96    | 43    | 10    | 424   | 22    | 82    | 27    | 904           |
| ZM384.4     | 10                                            | 10    | 10    | 23    | 27    | 10    | 10    | 10    | 69    | 41    | 10    | 10    | 200   | 36    | 118   | 96    | 2,151         |
| ZM384.5     | 10                                            | 10    | 10    | 10    | 25    | 10    | 10    | 29    | 76    | 39    | 27    | 10    | 172   | 39    | 47    | 94    | 2,046         |
| ZM394.10    | nt                                            | 10    | 20    | 10    | 10    | 10    | 10    | 22    | 75    | 87    | nt    | 20    | 73    | 39    | 10    | 45    | >2500         |
| ZM394.20    | 29                                            | 23    | 21    | 28    | 32    | 23    | 23    | 43    | 106   | 260   | 44    | 41    | 116   | 35    | 52    | 124   | 1,667         |
| ZM394.14    | 21                                            | 26    | 27    | 28    | 20    | 10    | 22    | 43    | 92    | 105   | 21    | 42    | 43    | 36    | 34    | 47    | 2,075         |
| ZM394.11    | 30                                            | 26    | 27    | 32    | 41    | 25    | 23    | 82    | 92    | 268   | 60    | 119   | 114   | 43    | 77    | 120   | 1,680         |
| ZM413.5     | nt                                            | nt    | 60    | 163   | 33    | 21    | 10    | 83    | 104   | 114   | nt    | 236   | 221   | 121   | 80    | 34    | 1,858         |
| ZM413.14    | nt                                            | nt    | 66    | nt    | 22    | 101   | 10    | 320   | 73    | 60    | nt    | 119   | 123   | 159   | 138   | 28    | >2500         |
| ZM413.19    | nt                                            | nt    | 216   | nt    | 70    | 169   | 49    | 89    | 78    | 10    | nt    | 60    | 217   | 67    | 139   | 80    | 2,347         |
| ZM413.7     | nt                                            | nt    | 294   | 202   | 91    | 32    | 99    | 111   | 136   | 88    | nt    | 216   | 311   | 122   | 126   | 190   | 754           |
| ZM418.1     | 94                                            | 10    | 38    | 300   | 64    | 24    | 20    | 200   | 121   | 60    | 126   | 161   | 304   | 542   | 144   | 40    | 1,447         |
| ZM418.6     | 232                                           | 10    | 991   | 266   | 160   | 74    | 10    | 510   | 163   | 2,640 | 137   | 3,203 | 318   | 931   | 1,175 | 49    | 418           |
| ZM418.9     | 206                                           | 39    | 48    | 369   | 262   | 54    | 27    | 143   | 147   | 54    | 118   | 205   | 463   | 249   | 457   | 74    | 655           |
| ZM418.14    | nt                                            | 148   | 38    | 972   | 777   | 43    | 51    | 305   | 120   | 80    | nt    | 372   | 708   | 893   | 2,290 | 84    | 250           |
| ZM378.7     | 10                                            | 10    | 10    | 10    | 28    | 10    | 10    | 94    | 99    | 225   | 149   | 55    | 253   | 62    | 58    | 87    | 1,267         |
| ZM378.16    | 10                                            | 10    | 10    | 69    | 49    | 10    | 10    | 162   | 109   | 592   | 215   | 354   | 209   | 84    | 106   | 112   | 1,435         |
| ZM378.13    | nt                                            | 10    | 25    | 10    | 36    | 10    | 10    | 89    | 91    | 209   | nt    | 165   | 95    | 45    | 60    | 83    | 1,653         |
| ZM378.10    | 10                                            | 10    | 10    | 10    | 35    | 10    | 10    | 168   | 91    | 409   | 111   | 157   | 302   | 68    | 105   | 98    | 931           |
| ZM378.20    | 10                                            | 10    | 10    | 29    | 72    | 26    | 10    | 239   | 120   | 774   | 144   | 531   | 325   | 78    | 150   | 139   | 887           |
| ZM379.2     | 10                                            | 10    | 10    | 10    | 10    | 10    | 10    | 10    | 77    | 10    | 79    | 10    | 237   | 133   | 107   | 26    | >2500         |
| ZM379.4     | 10                                            | 22    | 20    | 65    | 10    | 10    | 10    | 10    | 85    | 10    | 58    | 10    | 160   | 155   | 128   | 35    | >2500         |
| ZM379.15    | 10                                            | 10    | 10    | 10    | 10    | 10    | 10    | 10    | 83    | 10    | 95    | 10    | 95    | 234   | 158   | 25    | >2500         |
| ZM379.8     | 25                                            | 10    | 29    | 27    | 53    | 24    | 10    | 102   | 128   | 90    | 77    | 69    | 233   | 166   | 138   | 93    | 1,525         |
| ZM395.10    | nt                                            | 10    | 10    | 97    | 21    | 10    | 21    | 39    | 98    | 26    | nt    | 10    | 1,175 | 58    | 86    | 92    | 1,143         |
| ZM395.17    | nt                                            | 10    | 40    | 10    | 22    | 10    | 23    | 24    | 97    | 34    | nt    | 53    | 170   | 53    | 61    | 37    | 1,776         |
| ZM395.22    | nt                                            | nt    | 10    | 23    | 20    | 10    | 10    | 49    | 85    | 67    | nt    | 10    | 90    | 291   | 39    | 55    | 1,841         |
| ZM395.24    | nt                                            | nt    | 24    | 104   | 26    | 20    | 21    | 53    | 85    | 39    | nt    | 36    | 109   | 396   | 50    | 43    | 1,669         |
| ZM401.13    | 111                                           | 145   | 70    | 65    | 247   | 68    | 35    | 193   | 164   | 478   | 195   | 140   | 480   | 173   | 220   | 111   | 397           |
| ZM401.22    | 25                                            | 21    | 10    | 10    | 10    | 26    | 10    | 55    | 87    | 117   | 33    | 36    | 438   | 31    | 32    | 24    | 1,139         |
| ZM401.15    | 10                                            | 32    | 31    | 10    | 10    | 10    | 10    | 288   | 106   | 1,103 | 10    | 10    | 173   | 60    | 10    | 29    | 1,613         |
| ZM405.25    | nt                                            | 54    | 10    | 10    | 10    | 10    | 10    | 36    | 51    | 253   | nt    | 10    | 70    | 34    | 23    | 33    | >2500         |
| ZM405.48    | nt                                            | 35    | 21    | 25    | 23    | 25    | 10    | 45    | 112   | 130   | nt    | 26    | 96    | 44    | 40    | 115   | 1,529         |
| ZM405.53    | nt                                            | 25    | 24    | 10    | 24    | 10    | 10    | 46    | 91    | 135   | nt    | 28    | 112   | 41    | 47    | 71    | 1,922         |
| ZM408.15    | 28                                            | 88    | 10    | 10    | 30    | 10    | 21    | 343   | 183   | 564   | 10    | 39    | 24    | 169   | 75    | 296   | 865           |
| ZM408.42    | 194                                           | 32    | 163   | 10    | 38    | 10    | 10    | 186   | 79    | 417   | 29    | 50    | 359   | 161   | 60    | 230   | 2,093         |
| ZM408.19    | 28                                            | 10    | 190   | 10    | 40    | 10    | 10    | 338   | 73    | 293   | 87    | 10    | 91    | 23    | 132   | 10    | 1,860         |
| ZM408.20    | 128                                           | 38    | 33    | 10    | 27    | 10    | 27    | 370   | 87    | 842   | 58    | 58    | 598   | 266   | 53    | 95    | 1,380         |
| ZM408.30    | 82                                            | 41    | 192   | 30    | 714   | 10    | 55    | 2,291 | 167   | 342   | 121   | 88    | 271   | 70    | 593   | 66    | 1,032         |
| ZM415.10    | nt                                            | nt    | 21    | nt    | 47    | 218   | 10    | 106   | 91    | 307   | nt    | 278   | 243   | 39    | 114   | 25    | 1,057         |
| ZM415.11    | nt                                            | nt    | 130   | nt    | 51    | 133   | 20    | 32    | 97    | 26    | nt    | 10    | 45    | 37    | 21    | 41    | 2,430         |
| ZM415.15    | nt                                            | nt    | 196   | nt    | 39    | 124   | 10    | 33    | 102   | 29    | nt    | 10    | 85    | 26    | 24    | 35    | 2,021         |
| ZM416.14    | 20                                            | 32    | 10    | 79    | 26    | 10    | 10    | 26    | 151   | 338   | 30    | 10    | 284   | 79    | 37    | 33    | 1,122         |
| ZM416.10    | 10                                            | 40    | 22    | 10    | 43    | 86    | 10    | 132   | 247   | 289   | 189   | 169   | 661   | 3,769 | 110   | 77    | 907           |
| ZM416.8     | 10                                            | 51    | 26    | 10    | 24    | 74    | 10    | 121   | 158   | 524   | 50    | 75    | 437   | 1,661 | 106   | 68    | 804           |
| ZM416.23    | 51                                            | 136   | 42    | 87    | 39    | 95    | 27    | 121   | 241   | 209   | 215   | 47    | 828   | 1,116 | 449   | 203   | 303           |
| ZM416.6     | 10                                            | 10    | 24    | 10    | 10    | 38    | 23    | 137   | 129   | 72    | 112   | 82    | 464   | 269   | 48    | 58    | 1,686         |
| ZM417.2     | 10                                            | 33    | 10    | 24    | 50    | 28    | 10    | 10    | 185   | 176   | 150   | 64    | 162   | 834   | 135   | 139   | 1,055         |
| ZM417.4     | 10                                            | 10    | 10    | 10    | 10    | 38    | 10    | 192   | 125   | 34    | 327   | 81    | 554   | 302   | 155   | 48    | 2,383         |
| ZM417.6     | nt                                            | 38    | 25    | 10    | 50    | 36    | 10    | 44    | 173   | 114   | nt    | 38    | 296   | 51    | 125   | 141   | 1,293         |
| MLV-SVA     | 10                                            | 10    | 10    | 10    | 10    | 10    | 10    | 10    | 69    | 10    | 10    | 10    | 10    | 10    | 10    | 10    | >2500         |

<sup>1</sup>Values are the plasma dilution at which RLU were reduced 50% relative to virus control wells (no test sample). Titers <20 were assigned a value of 10. Red: >1,000; orange: 500-1000; green: 100-499; yellow: 20-99; white: <20 (shown as 10) or nt (not tested)
